# Supplementary material for: How Rh surface breaks CO2 molecules under ambient pressure
Source: PubMed Central journal article supplement (PMC7648795; doi:10.1038/s41467-020-19398-1), 2020-11-06
Supplement: 41467_2020_19398_MOESM3_ESM.pdf [file 41467_2020_19398_MOESM3_ESM.pdf]

## **Description of Additional Supplementary Files**

File Name: Supplementary Movie 1

Description: Supplementary Movie showing the side view of the normal mode corresponding to the imaginary frequency of the transition state.

File Name: Supplementary Movie 2

Description: Supplementary Movie showing the top view of the normal mode corresponding to the imaginary frequency of the transition state.
